# Supplementary material
Source: PubMed Central journal article supplement (PMC3086541)

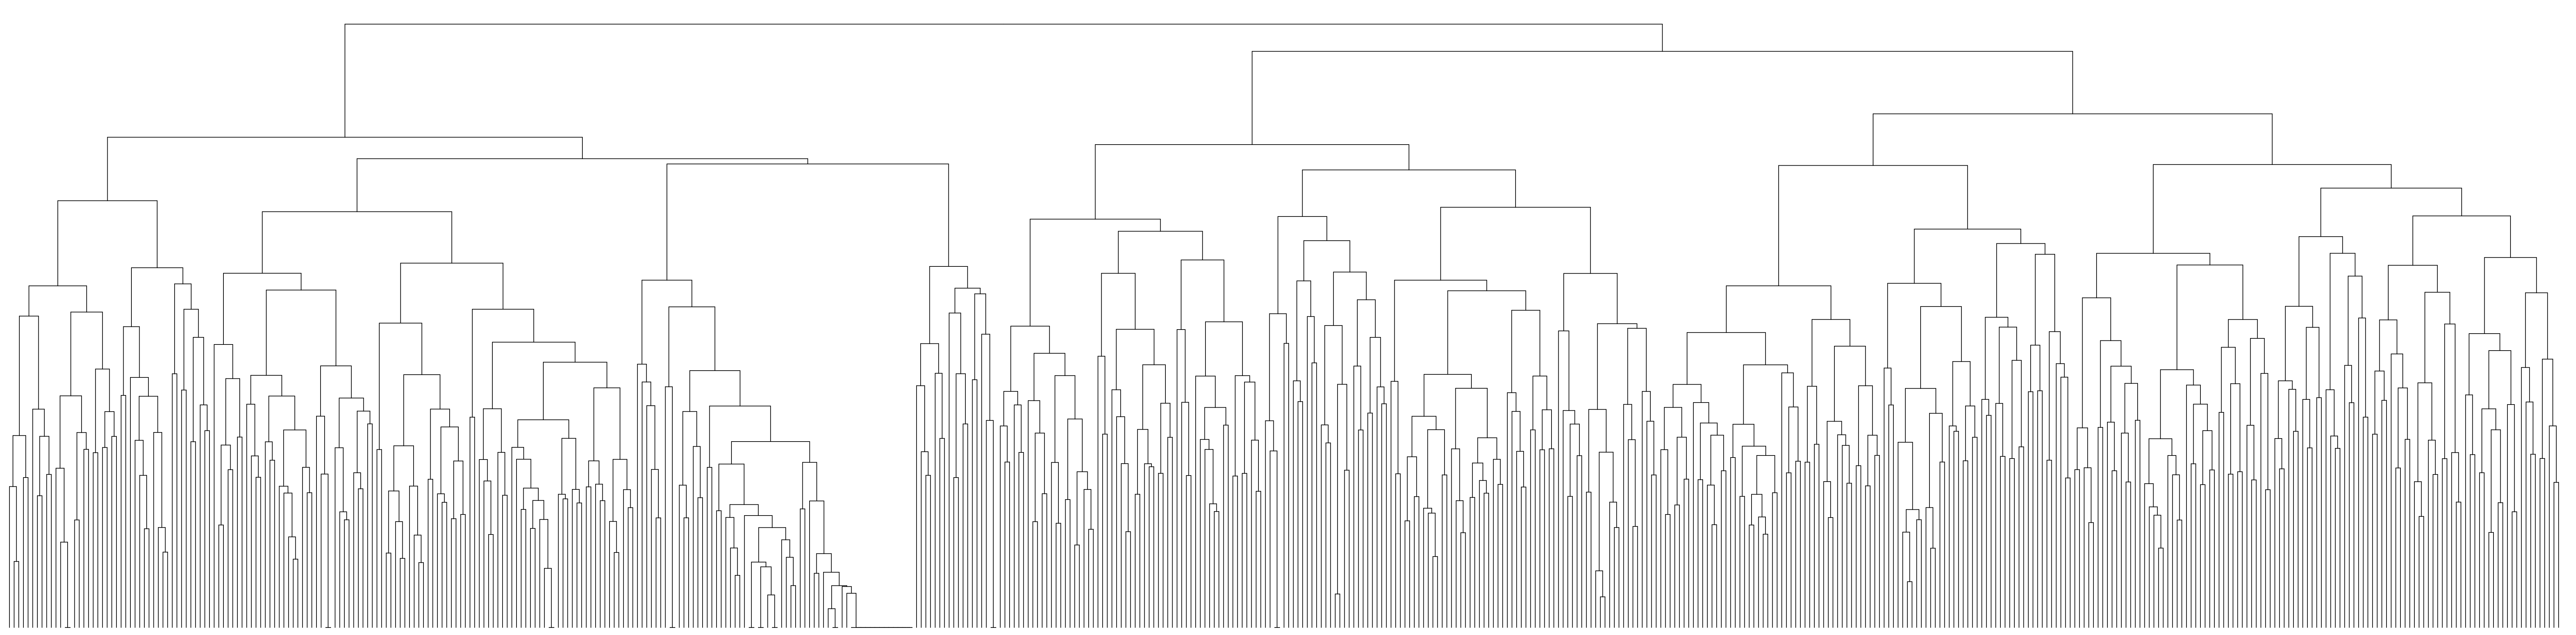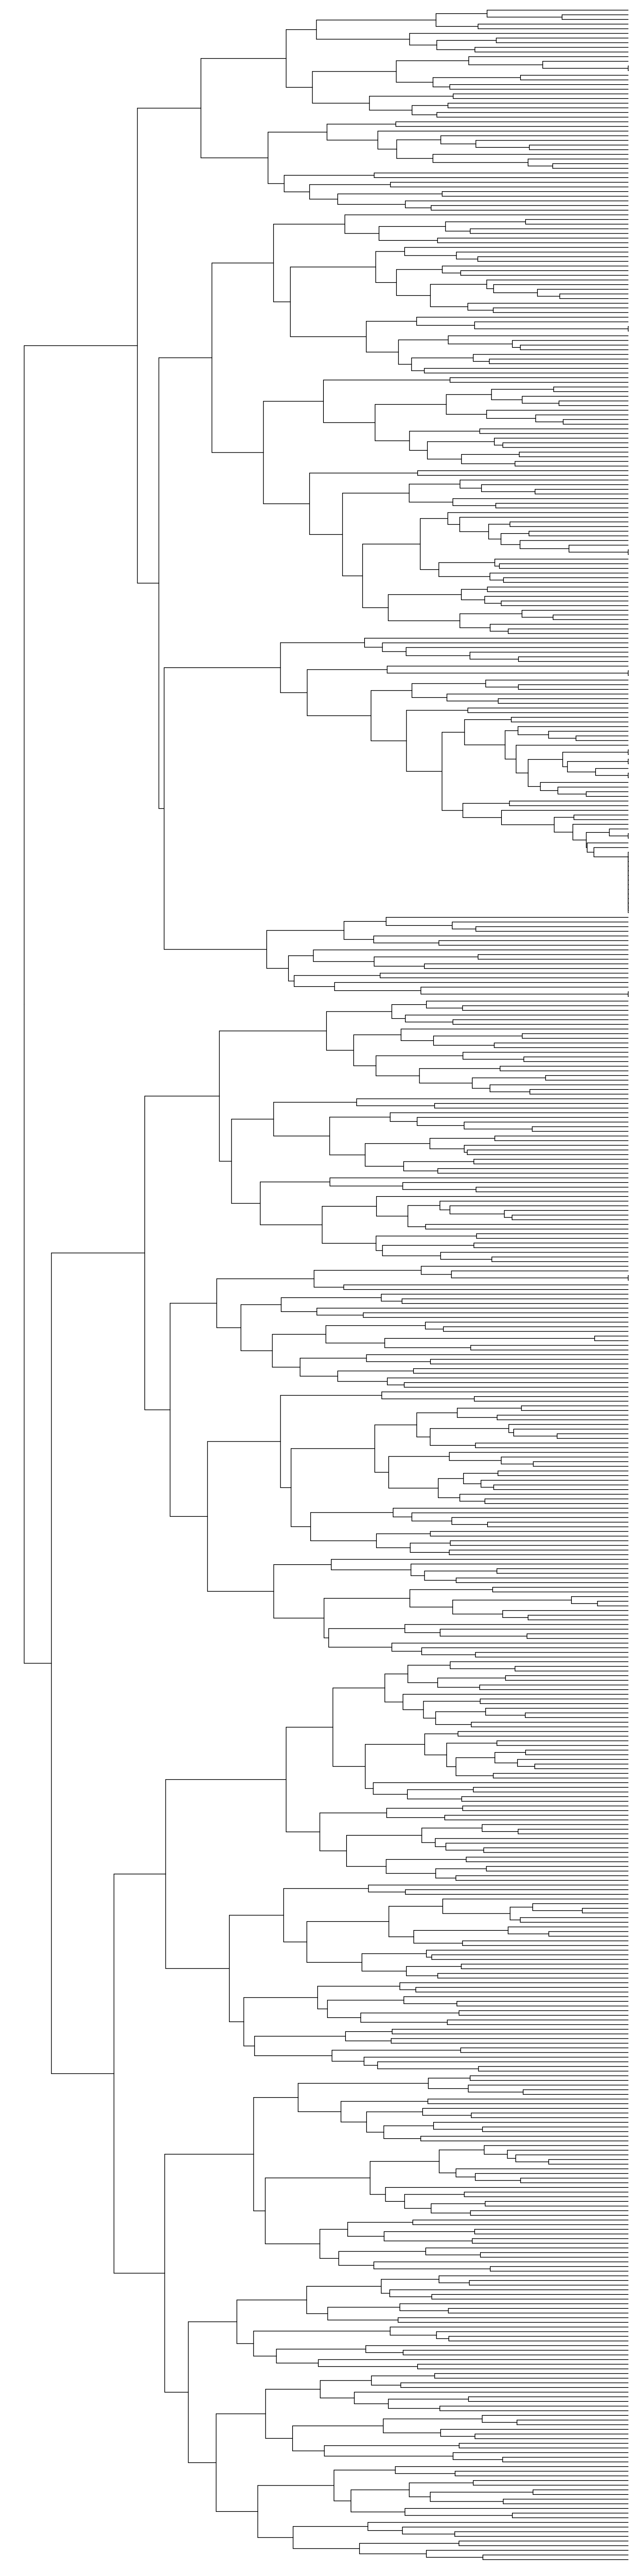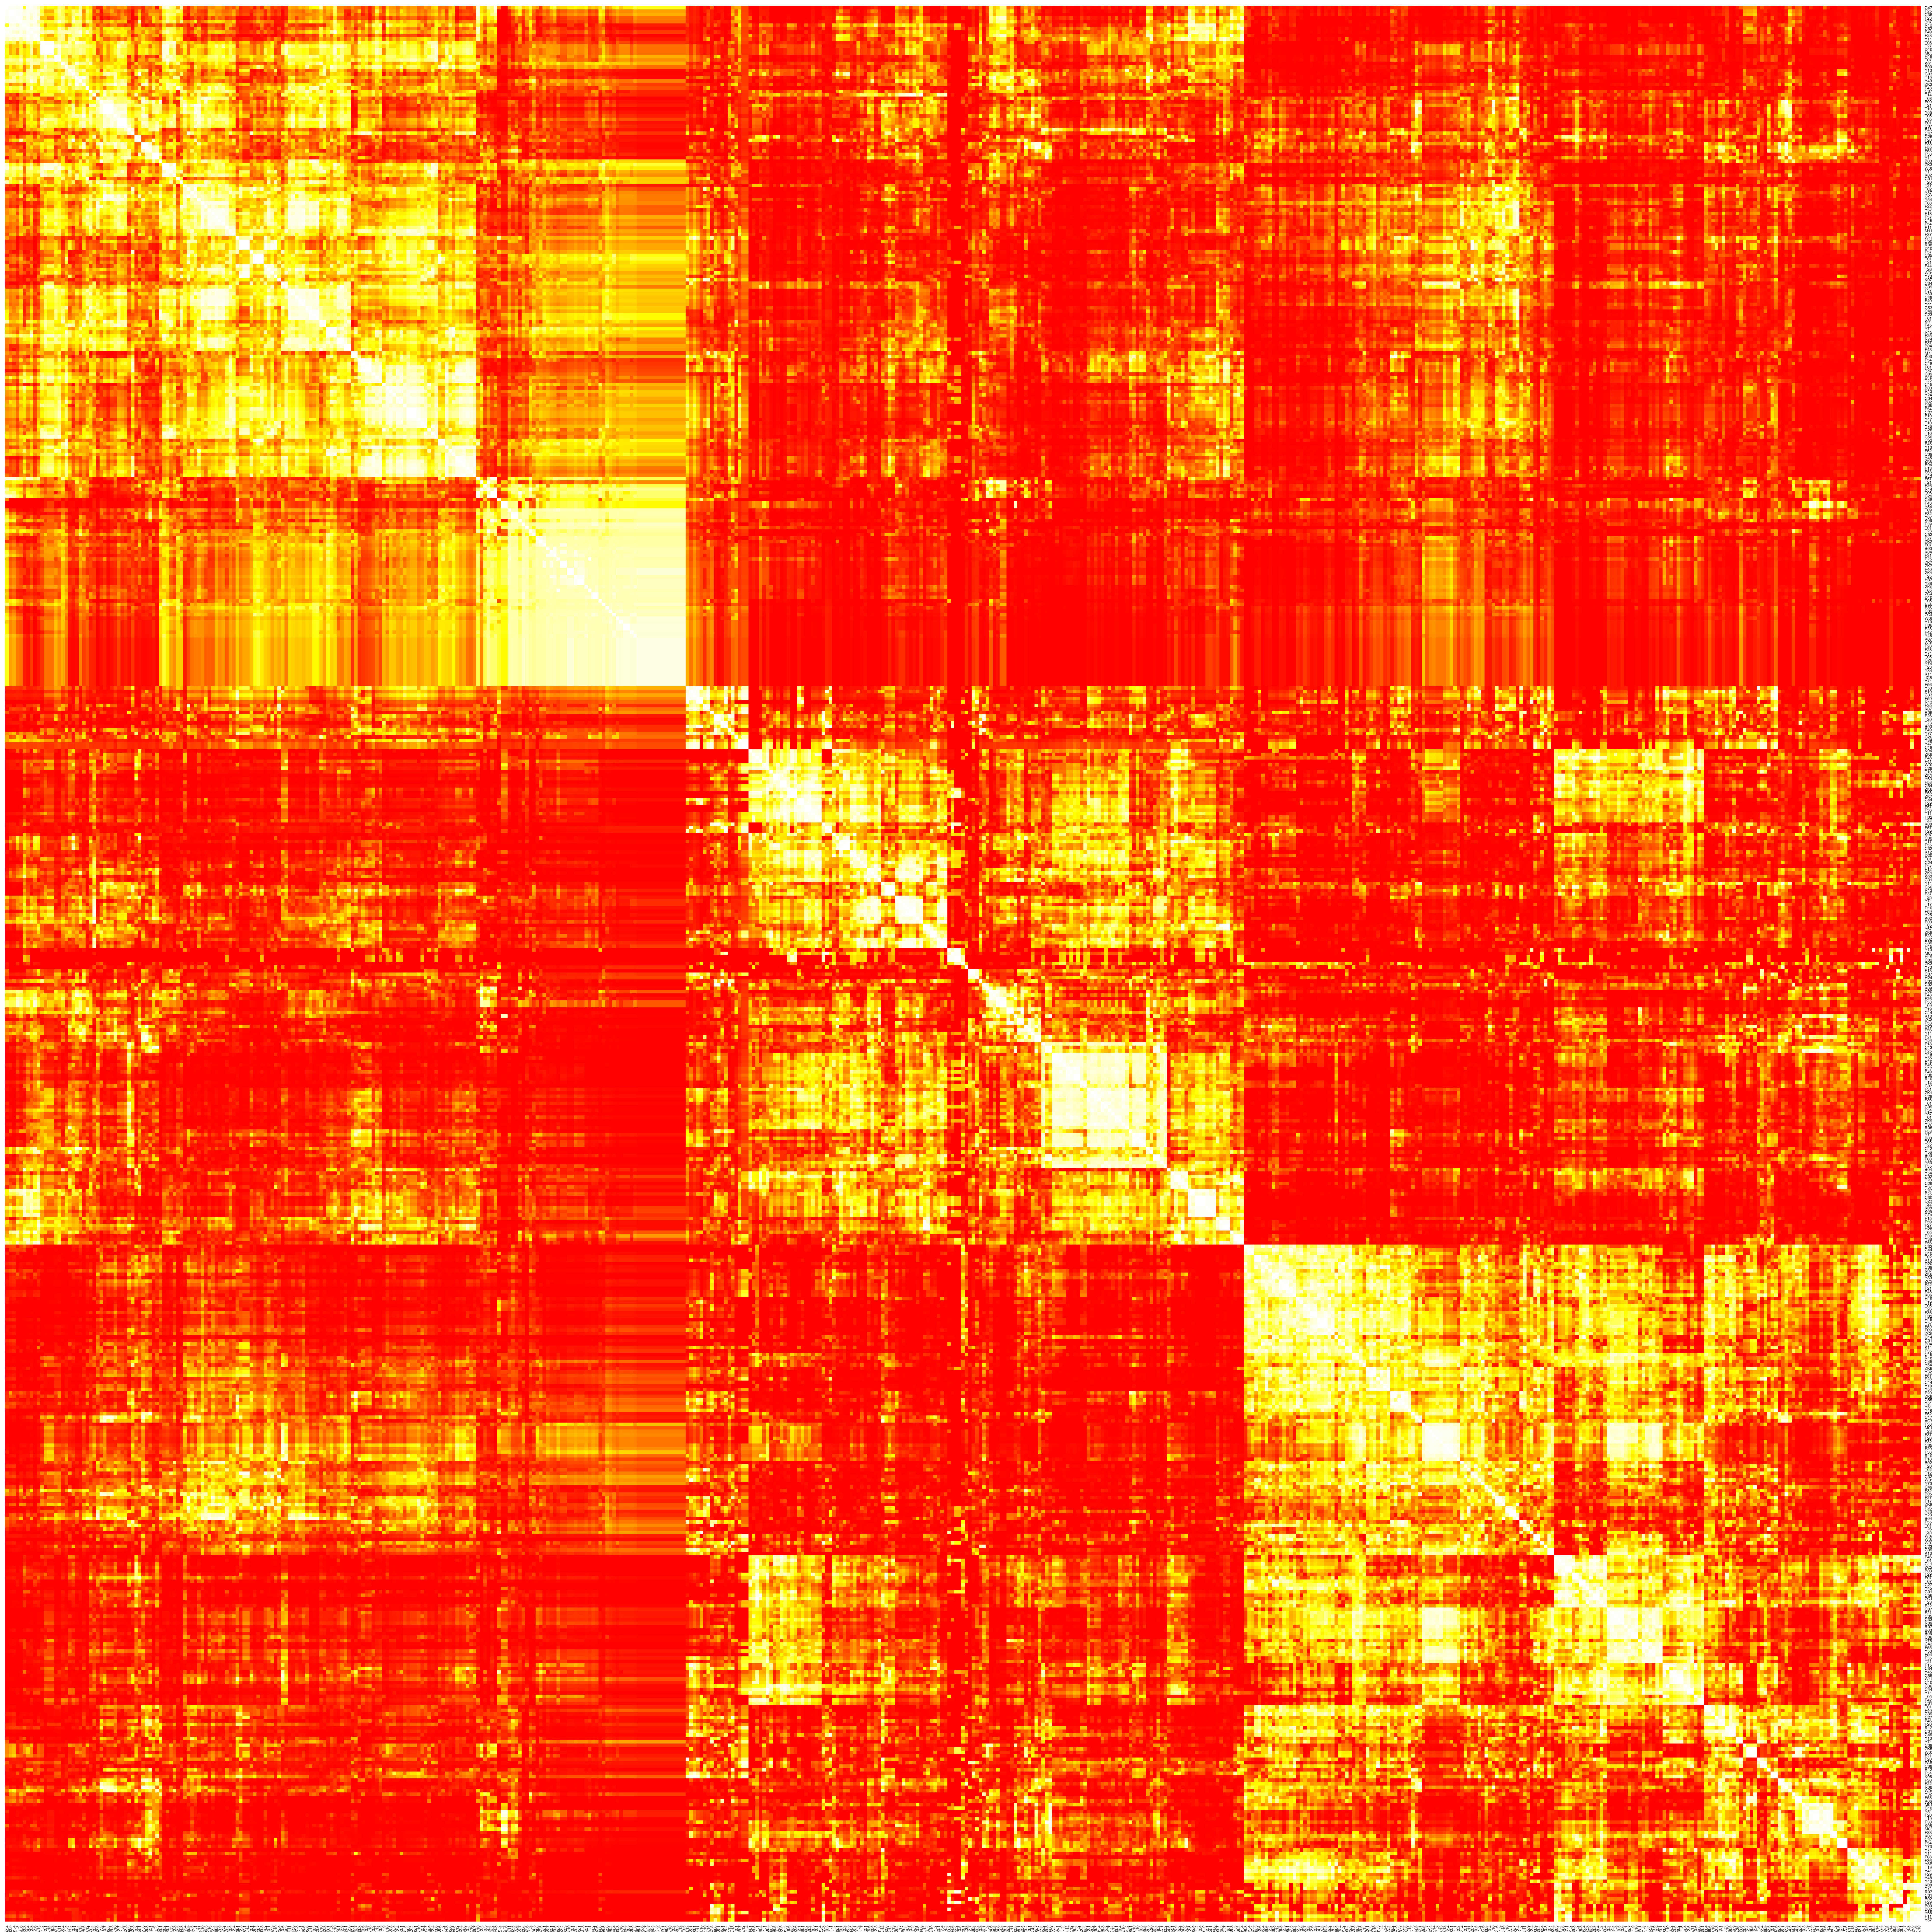

Supplement: NIHMS285705-supplement-05.pdf [file NIHMS285705-supplement-05.pdf]
